# Supplementary material for: The Mitochondrial Genomes of Two Parasitoid Wasps Protapanteles immunis and Parapanteles hyposidrae (Hymenoptera: Braconidae) with Phylogenetic Implications and Novel Gene Rearrangements
Source: MDPI journal article supplement (doi:10.3390/genes14010230), 2023-01-16
Supplement: s1 [file s1]

## Supplementary Materials

Table S1. Codon usage in the mitochondrial genome of *Pa. hypsidrae*.

| Amino acid | Codon | Number | RSCU   | Amino acid | Codon | Number | RSCU   |
|------------|-------|--------|--------|------------|-------|--------|--------|
| Ala        | GCA   | 26     | 1.6508 | Pro        | CCA   | 47     | 1.9583 |
|            | GCC   | 1      | 0.0635 |            | CCC   | 1      | 0.0417 |
|            | GCG   | 2      | 0.1270 |            | CCG   | 0      | 0      |
|            | GCU   | 34     | 2.1587 |            | CCU   | 48     | 2      |
| Cys        | UGC   | 0      | 0      | Gln        | CAA   | 39     | 1.9024 |
|            | UGU   | 29     | 2      |            | CAG   | 2      | 0.0976 |
| Asp        | GAC   | 1      | 0.0328 | Arg        | CGA   | 19     | 1.7674 |
|            | GAU   | 60     | 1.9672 |            | CGC   | 0      | 0      |
| Glu        | GAA   | 70     | 1.9718 |            | CGG   | 0      | 0      |
|            | GAG   | 1      | 0.0282 | Ser        | CGU   | 24     | 2.2326 |
| Phe        | UUC   | 12     | 0.0570 |            | AGA   | 72     | 1.8403 |
|            | UUU   | 409    | 1.9430 |            | AGC   | 0      | 0      |
| Gly        | GGA   | 98     | 2.5290 |            | AGG   | 3      | 0.0767 |
|            | GGC   | 0      | 0      |            | AGU   | 32     | 0.8179 |
|            | GGG   | 3      | 0.0774 |            | UCA   | 126    | 3.2204 |
|            | GGU   | 54     | 1.3935 |            | UCC   | 3      | 0.0767 |
| His        | CAC   | 1      | 0.0308 | Thr        | UCG   | 1      | 0.0256 |
|            | CAU   | 64     | 1.9692 |            | UCU   | 76     | 1.9425 |
| Ile        | AUC   | 5      | 0.0200 |            | ACA   | 52     | 2.1224 |
|            | AUU   | 496    | 1.9800 |            | ACC   | 2      | 0.0816 |
| Lys        | AAA   | 147    | 1.9470 |            | ACG   | 0      | 0      |
|            | AAG   | 4      | 0.0530 |            | ACU   | 44     | 1.7959 |
| Leu        | CUA   | 6      | 0.0576 | Val        | GUA   | 40     | 1.5686 |
|            | CUC   | 0      | 0      |            | GUC   | 0      | 0      |
|            | CUG   | 0      | 0      |            | GUG   | 2      | 0.0784 |
|            | CUU   | 8      | 0.0768 | Trp        | GUU   | 60     | 2.3529 |
|            | UUA   | 597    | 5.7312 |            | UGA   | 78     | 1.9259 |
|            | UUG   | 14     | 0.1344 |            | UGG   | 3      | 0.0741 |
| Met        | AUA   | 328    | 1.8960 | Tyr        | UAC   | 8      | 0.0762 |
|            | AUG   | 18     | 0.1040 |            | UAU   | 202    | 1.9238 |
| Asn        | AAC   | 7      | 0.0502 |            |       |        |        |
|            | AAU   | 272    | 1.9498 |            |       |        |        |

Table S2. Codon usage in the mitochondrial genome of *Pr. immunis*.

| Amino acid | Codon | AA | Number | RSCU   | Amino acid | Codon | AA | Number | RSCU   |
|------------|-------|----|--------|--------|------------|-------|----|--------|--------|
| Ala        | GCA   | A  | 16     | 1.0667 | Pro        | CCA   | P  | 32     | 1.3617 |
|            | GCC   | A  | 0      | 0      |            | CCC   | P  | 1      | 0.0426 |
|            | GCG   | A  | 0      | 0      |            | CCG   | P  | 2      | 0.0851 |
|            | GCU   | A  | 44     | 2.9333 |            | CCU   | P  | 59     | 2.5106 |
| Cys        | UGC   | C  | 0      | 0      | Gln        | CAA   | Q  | 37     | 1.8974 |
|            | UGU   | C  | 35     | 2      |            | CAG   | Q  | 2      | 0.1026 |
| Asp        | GAC   | D  | 0      | 0      | Arg        | CGA   | R  | 21     | 1.9535 |
|            | GAU   | D  | 61     | 2      |            | CGC   | R  | 1      | 0.0930 |
| Glu        | GAA   | E  | 67     | 2      |            | CGG   | R  | 0      | 0      |
|            | GAG   | E  | 0      | 0      |            | CGU   | R  | 21     | 1.9535 |
| Phe        | UUC   | F  | 3      | 0.0134 | Ser        | AGA   | S  | 71     | 1.9254 |
|            | UUU   | F  | 446    | 1.9866 |            | AGC   | S  | 0      | 0      |
| Gly        | GGA   | G  | 80     | 2.2222 |            | AGG   | S  | 2      | 0.0542 |
|            | GGC   | G  | 1      | 0.0278 |            | AGU   | S  | 24     | 0.6508 |
|            | GGG   | G  | 1      | 0.0278 |            | UCA   | S  | 116    | 3.1458 |
|            | GGU   | G  | 62     | 1.7222 |            | UCC   | S  | 3      | 0.0814 |
| His        | CAC   | H  | 1      | 0.0323 |            | UCG   | S  | 0      | 0      |
|            | CAU   | H  | 61     | 1.9677 |            | UCU   | S  | 79     | 2.1424 |
| Ile        | AUC   | I  | 6      | 0.0267 | Thr        | ACA   | T  | 62     | 2.4314 |
|            | AUU   | I  | 444    | 1.9733 |            | ACC   | T  | 2      | 0.0784 |
| Lys        | AAA   | K  | 151    | 1.9484 |            | ACG   | T  | 0      | 0      |
|            | AAG   | K  | 4      | 0.0516 |            | ACU   | T  | 38     | 1.4902 |
| Leu        | CUA   | L  | 3      | 0.0306 | Val        | GUA   | V  | 42     | 1.4359 |
|            | CUC   | L  | 0      | 0      |            | GUC   | V  | 0      | 0      |
|            | CUG   | L  | 0      | 0      |            | GUG   | V  | 2      | 0.0684 |
|            | CUU   | L  | 8      | 0.0816 | Trp        | GUU   | V  | 73     | 2.4957 |
|            | UUA   | L  | 564    | 5.7551 |            | UGA   | W  | 76     | 1.9740 |
|            | UUG   | L  | 13     | 0.1327 |            | UGG   | W  | 1      | 0.0260 |
| Met        | AUA   | M  | 344    | 1.9380 | Tyr        | UAC   | Y  | 1      | 0.0101 |
|            | AUG   | M  | 11     | 0.0620 |            | UAU   | Y  | 198    | 1.9899 |
| Asn        | AAC   | N  | 1      | 0.0070 |            |       |    |        |        |
|            | AAU   | N  | 285    | 1.9930 |            |       |    |        |        |

**Table S3.** Information of mitochondrial genomes used in phylogenetic analysis.

| <b>Family</b>   | <b>Subfamily</b> | <b>Tribe</b>  | <b>Species</b>                     | <b>Accession number</b> |
|-----------------|------------------|---------------|------------------------------------|-------------------------|
| Braconidae      | Microgastrinae   | Apantelini    | <i>Choeras grammatitergitus</i>    | KT215850                |
| Braconidae      | Microgastrinae   | Apantelini    | <i>Dolichogenidea</i> sp.          | KT215851                |
| Braconidae      | Microgastrinae   | Cotesiini     | <i>Protopanteles</i> sp.           | KT215853                |
| Braconidae      | Microgastrinae   | Cotesiini     | <i>Diolcogaster</i> sp.            | KT215854                |
| Braconidae      | Microgastrinae   | Cotesiini     | <i>Cotesia vestalis</i>            | NC_014272               |
| Braconidae      | Microgastrinae   | Cotesiini     | <i>Cotesia flavipes</i>            | NC_063945               |
| Braconidae      | Microgastrinae   | Microgastrini | <i>Microgaster campestris</i>      | KT215844                |
| Braconidae      | Microgastrinae   | Microgastrini | <i>Hygroplitis sinica</i>          | KT215856                |
| Braconidae      | Microgastrinae   | Microgastrini | <i>Microgaster</i> sp.             | KT215857                |
| Braconidae      | Microgastrinae   | Microplitini  | <i>Microplitis incurvatus</i>      | KT215845                |
| Braconidae      | Microgastrinae   | Microplitini  | <i>Snellenius</i> sp.              | KT215848                |
| Braconidae      | Microgastrinae   | Microplitini  | <i>Snellenius radicalis</i>        | KT215849                |
| <b>Outgroup</b> |                  |               |                                    |                         |
| Braconidae      | Macrocentrinae   |               | <i>Macrocentrus camphoraphilus</i> | GU097656                |
| Braconidae      | Agathidinae      |               | <i>Therophilus festivus</i>        | KF385868                |
